# Supplementary material
Source: PubMed Central journal article supplement (PMC3083729)

# Figure 2

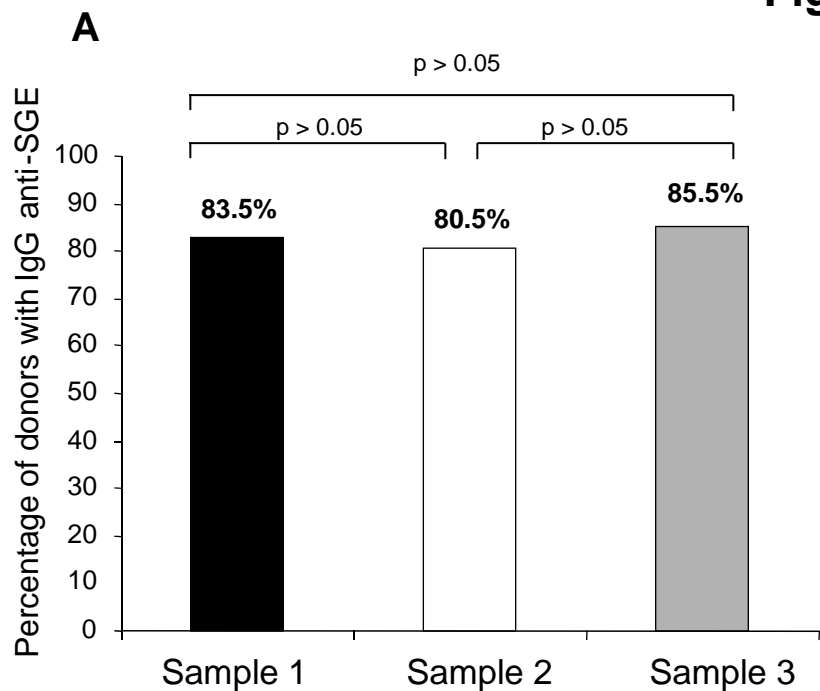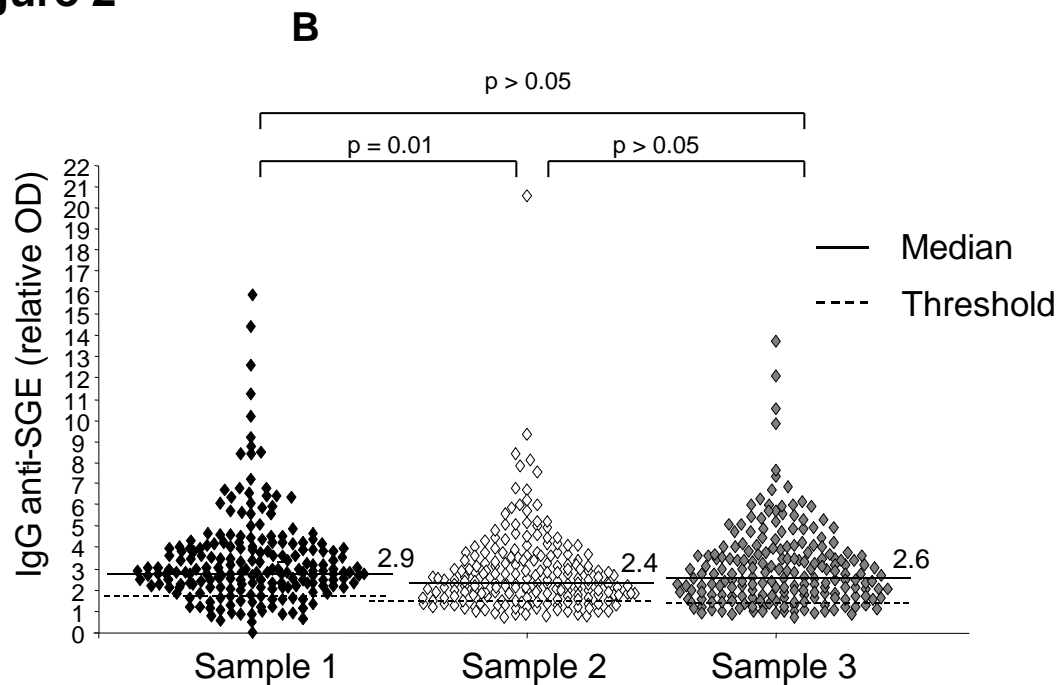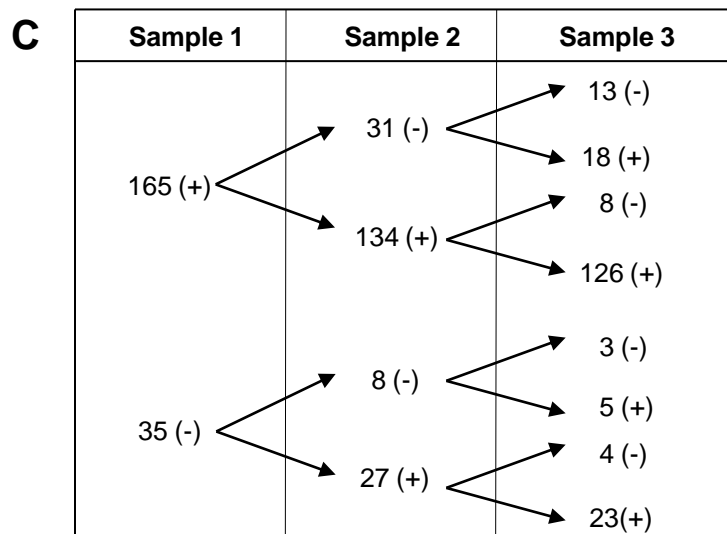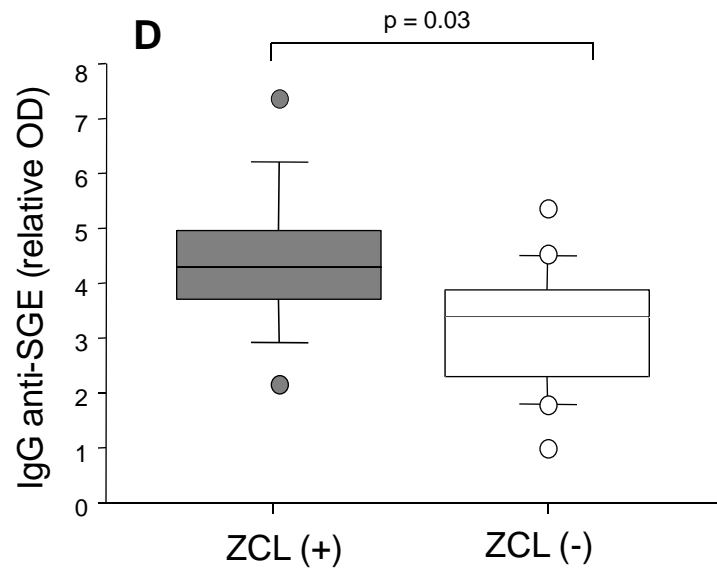

Supplement: supp_84_5_653__1.pdf [file supp_84_5_653__1.pdf]
